1  
2  
3  
4  
5  
6  
7  
8  
9  
10  
11  
12  
13  
14  
15  
16  
17  
18  
19  
20  
21  
22  
23  
24  
25  
26  
27

## Title

Chemo-mechanical Coupling in the Transport Cycle of a Type II ABC Transporter

## Authors

Koichi Tamura<sup>1\*</sup>, Hiroshi Sugimoto<sup>2,3</sup>, Yoshitsugu Shiro<sup>2,3</sup>, Yuji Sugita<sup>1,4,5</sup>

<sup>1</sup> *Computational Biophysics Research Team, RIKEN Center for Computational Science, 6-7-1 Minatojima-Minamimachi, Chuo-ku, Kobe, Hyogo 650-0047, Japan*

<sup>2</sup> *Graduate School of Life Science, University of Hyogo, 3-2-1 Kouto, Kamigori, Ako, Hyogo 678-1297, Japan*

<sup>3</sup> *Synchrotron Radiation Life Science Instrumentation Team, RIKEN SPring-8 Center, 1-1-1 Kouto, Sayo, Hyogo 679-5148, Japan*

<sup>4</sup> *Theoretical Molecular Science Laboratory, RIKEN Cluster for Pioneering Research, 2-1 Hirosawa, Wako, Saitama 351-0198, Japan*

<sup>5</sup> *Laboratory for Biomolecular Function Simulation, RIKEN Center for Biosystems Dynamics Research, 6-7-1 Minatojima-Minamimachi, Chuo-ku, Kobe, Hyogo 650-0047, Japan*

\* Corresponding author: [k.tamur@gmail.com](mailto:k.tamur@gmail.com)

ORCID IDs:

Koichi Tamura (0000-0002-9472-7555)

Hiroshi Sugimoto (0000-0002-3140-8362)

Yoshitsugu Shiro (0000-0003-0695-8327)

Yuji Sugita (0000-0001-9738-9216)

## Abstract

28

29

30 ATP-binding cassette (ABC) transporters are integral membrane proteins that  
31 translocate a wide range of substrates across biological membranes, harnessing free  
32 energy from the binding and hydrolysis of ATP. To understand the mechanism of the  
33 inward- to outward-facing transition that could be achieved by tight regulation of  
34 ATPase activity through extensive conformational changes of the protein, we applied  
35 template-based iterative all-atom molecular dynamics (MD) simulation to the heme  
36 ABC transporter BhuUV-T. The simulations, together with biased MDs, predict two  
37 new conformations of the protein, namely, occluded (Occ) and outward-facing (OF)  
38 conformations. The comparison between the inward-facing crystal structure and the  
39 predicted two structures shows atomic details of the gating motions at the  
40 transmembrane helices and dimerization of the nucleotide-binding domains (NBDs).  
41 The MD simulations further reveal a novel role of the ABC signature motifs  
42 (LSGG[Q/E]) at the NBDs in decelerating ATPase activity in the Occ form through  
43 sporadic flipping of the side chains of the LSGG[Q/E] catalytic serine residues. The  
44 orientational changes are coupled to loose NBD dimerization in the Occ state, whereas  
45 they are blocked in the OF form where the NBDs are tightly dimerized. The  
46 chemo-mechanical coupling mechanism may apply to other types of ABC transporters  
47 having the conserved LSGG[Q/E] signature motifs.

48

## Introduction

49

50

51 Chemo-mechanical couplings where large conformational changes of a protein are  
52 coupled to chemical events (i.e., binding and hydrolysis of nucleotide triphosphates) are  
53 often found in biomolecular motors,<sup>1-3</sup> signaling proteins,<sup>3</sup> chaperones,<sup>4</sup> and clock  
54 proteins.<sup>5</sup> The existence of the coupling implies that appropriate positioning<sup>6</sup> of the  
55 catalytically competent residues is realized only in a catalytic-dwell state of a protein  
56 and is disrupted in other conformational states of the cycle to prevent futile usage of  
57 ATP. For example, the formation of the catalytic-dwell state of the myosin motor is  
58 coupled to a global conformational change that brings the catalytic loop (switch II)  
59 closer to the ATP-binding P-loop.<sup>7,8</sup> Elucidation of chemo-mechanical coupling  
60 mechanism is central to understanding biomolecular machines including ATP-binding  
61 cassette (ABC) transporter.

62 ABC transporters are integral membrane proteins that are ubiquitous in all life  
63 forms and mediate the translocation of diverse substrates across the lipid bilayer,  
64 harnessing the free energy gained by the binding and hydrolysis of ATP.<sup>9-11</sup> They are  
65 involved in a vast variety of biological processes and their malfunction due to mutation  
66 often leads to serious medical conditions such as cystic fibrosis<sup>12</sup> and multidrug  
67 resistance.<sup>13</sup> Much attention has been paid to their transport mechanisms with a view to  
68 developing effective therapies.

69 ABC transporters have a common architecture: two transmembrane domains  
70 (TMDs) that form a substrate binding pocket, and two nucleotide-binding domains

71 (NBDs) that bind and hydrolyze ATP (Figure 1a). Some ABC transporters have  
72 covalently linked TMD and NBD, while in others the domains are separate. The TMDs  
73 and the NBDs are physically connected by coupling helices (CHs) which transmit the  
74 conformational change at the NBDs to the TMDs. Each NBD has a well-conserved<sup>10,11</sup>  
75 phosphate-binding motif (P-loop)<sup>14</sup> and an ABC signature motif (LSGG[Q/E]).<sup>15</sup> It is  
76 well established that the binding of ATP induces dimerization of the NBDs in a  
77 head-to-tail fashion in which the P-loop of one monomer sandwiches ATP with the  
78 signature motif of the opposite monomer (Figure 1b).<sup>16,17</sup> The dimerization realizes the  
79 formation of competent catalytic sites where the side chains of opposing monomers are  
80 oriented toward the substrate so that the transition state(s) of the hydrolysis reaction is  
81 stabilized.

82 The translocation of substrates by ABC transporters is thought to occur by an  
83 alternating access mechanism (Figure 1c).<sup>10,11</sup> In this mechanism, the structure of the  
84 ABC transporter alternates between inward-facing (IF) and outward-facing (OF) forms.  
85 The formation of an occluded (Occ) intermediate during the conformational transition  
86 between IF and OF makes the substrate binding pocket inaccessible to bulk solvent and  
87 prevents reverse transport. This is a key feature of transporters, and contrasts with  
88 channel proteins.

89 ABC transporters are classified into exporters and importers according to the  
90 substrate transport direction.<sup>9</sup> Importers, which are found only in prokaryotes, are  
91 further classified into type I, type II and energy coupling factor (ECF) transporters.<sup>10,11</sup>  
92 Each class of importer has a different substrate transport strategy and a specific

93 structural fold. Type I and II importers are associated with a periplasmic binding protein  
94 (PBP) that binds substrate in the periplasm and delivers it to the TMDs of the ABC  
95 transporter.<sup>10,11</sup> Type I importers transport relatively small compounds such as sugars,  
96 while type II importers are specific for the transport of trace elements.<sup>10,11</sup> The ECF  
97 transporters share a unique substrate acquisition mechanism and are devoted to the  
98 transport of micronutrients.<sup>18</sup>

99 Atomic structures of full ABC transporters largely come from experimental  
100 studies using X-ray crystallography<sup>10,11</sup> and/or cryo-electron microscopy.<sup>19</sup> These  
101 techniques, however, often yield the protein structure of only one of the possible  
102 conformational states and relatively unstable intermediates along the functional cycle  
103 are difficult to elucidate, which is a major obstacle to the understanding of the coupling  
104 mechanism. In this respect, atomistic molecular dynamics (MD) simulations are a  
105 promising approach to reveal experimentally inaccessible conformational states in  
106 transporters.<sup>20–30</sup> Homology (comparative) modeling techniques<sup>31,32</sup> are also widely  
107 applied to predict elusive conformational states in a protein.<sup>33,34</sup> Since these techniques  
108 do not take into account thermal motions of proteins, the conformational stability of  
109 putative structures needs to be carefully examined by MD simulation.

110 In this study, we employ template-based iterative atomistic MD simulation to  
111 predict hitherto unknown conformations of heme importer of *B. cenocepacia*  
112 (BhuUV-T)<sup>35</sup> and provide insights into the mechanism of the IF-to-OF transition  
113 occurring after substrate translocation. BhuUV-T belongs to the type II ABC importer  
114 family and transports heme (Fe-porphyrin complex) across the inner membrane of

115 bacteria. Heme importers in pathogenic bacteria play a major role in the acquisition of  
116 iron, which is utilized during infection and propagation. BhuUV-T is a dimer of a dimer  
117 (BhuU (TMD) + BhuV (NBD)), together with a PBP (BhuT) (Figure 2a and S1). The  
118 coupling helices (CHs), which physically link the NBDs and the TMDs, are located  
119 between TM6 and 7 (Figure 2a and S1). BhuUV-T has been crystalized in an apo IF  
120 conformation with and without BhuT (throughout this manuscript, we use the term “apo”  
121 for the structure without bound nucleotides and substrates) and their structures have  
122 been characterized crystallographically.<sup>35</sup> The apo IF conformation with bound BhuT  
123 (Figure 2a) may represent a post-translocation state, in which a heme has already been  
124 released towards the cytoplasm. The transport cycle is postulated to proceed via the  
125 binding of ATP at the NBDs (BhuVs) to eventually form the OF state. The formation of  
126 the OF state would be accompanied by full dimerization of the NBDs (BhuVs) and the  
127 dissociation of BhuT. As mentioned, the cycle for transporters likely involves the  
128 transient formation of an Occ state after the translocation of substrate. Formation of the  
129 Occ state and closure of the cytoplasmic gate are thought to result from the binding of  
130 ATP and dimerization of the NBDs (BhuVs) (Figure 1c). The question which then arises  
131 is: how is the hydrolysis of ATP prevented in the Occ state, such that futile cycling back  
132 to the IF state is avoided, before formation of the OF state? To solve this problem, we  
133 analyzed MD trajectories of BhuUV-T starting from predicted Occ and OF  
134 conformations and arrived at a novel chemo-mechanical coupling mechanism that  
135 regulates ATPase activity by way of reorientation of the serine residues of the  
136 LSGG[Q/E] motifs in type II ABC transporters. The proposed mechanism likely

137 extends to other types of ABC transporters, as dimerization of NBDs is a common

138 feature.<sup>10,11</sup>

139

## Computational Methods

140

141

142 **Overall strategy.** In this study, we focus on the IF-to-OF transition of heme importer  
143 BhuUV-T (Figure 2). Accordingly, our simulation systems do not contain the heme  
144 substrate. The unknown OF structure of the heme importer (Figure 2c) was modeled by  
145 template-based iterative MD simulation. The technique consists of iterative refinements  
146 of rough model by all atom MD simulations which consider solvent and membrane  
147 environment. The initial rough model was generated with homology modeling<sup>31,32</sup> using  
148 the structure of the vitamin B<sub>12</sub> transport protein BtuCD in the ATP analog-bound form  
149 as template (PDB 4R9U).<sup>36</sup> Since 2002 several crystal structures of type II ABC  
150 importers have been elucidated, but the BtuCD structure is the only OF structure with  
151 bound nucleotides (Table S1). The engineered disulfide bond introduced in the BtuCD  
152 structure to suppress basal ATPase activity was not included in the homology model.  
153 The relatively low sequence identity (~34%) between BhuUV and BtuCD poses a  
154 significant challenge for homology modeling of thermally stable structures in the  
155 membrane environment. We therefore extensively refined the predicted structure by a  
156 series of MD simulations. Modeling procedures are briefly summarized in the following  
157 section, and details are described in SI (Text S1). The structural stabilities of the  
158 predicted structures were examined by relatively long (~1  $\mu$ s) MD simulations without  
159 any restraints on protein atoms.

160

161 We first considered the nucleotide-bound Occ crystal structure of BtuCD-F (PDB  
4FI3)<sup>37</sup> as a template of the Occ form, however, the lower resolution (3.47 Å) compared



162 to that of the OF form (2.79 Å) could have introduced further uncertainties into the  
163 modeling process. Instead, the Occ form (Figure 2b) was modeled by targeted MD  
164 (tMD) simulation<sup>38</sup> using part of the modeled OF structure as target (see below). The  
165 effect of the binding of ATP to the NBDs was then investigated by comparing the  
166 predicted structures with the crystal structure of the apo IF form (Figure 2).  
167 Representative MD simulations are summarized in Table S2.

168

169 **Iterative refinements of the OF form.** We employed MODELLER version 9.16 for  
170 building the homology models.<sup>31,32</sup> Sequence alignments were generated by the  
171 `align2d()` function in MODELLER, using the template 3D structure to put gaps in  
172 the alignment. For example, the function avoids placing gaps within the secondary  
173 structure. Altogether, we generated four structural models (MODEL1–4). The first OF  
174 model with bound ATP, which was based on an alignment involving several manual  
175 adjustments (MODEL1), turned out to be unstable after a short MD simulation of ~20  
176 ns: we observed spontaneous closure of the periplasmic gate and distortion of the  
177 helices at Arg121 to Gly134 of both NBD monomers (Figure S2a and S2b). The  
178 instability, especially in the helical region in the NBDs, seemed to originate from the  
179 rather low sequence identity between BhuUV and the vitamin B<sub>12</sub> transporter BtuCD  
180 used as template (Figure S2c). On the other hand, there is a crystal structure of a heme  
181 importer of *Y. pestis* (HmuUV) in the apo OF form (PDB 4G1U)<sup>39</sup> having a higher  
182 sequence identity (~40%) which can generate better models. Note that the *apo* HmuUV  
183 structure has a significantly different structural arrangement compared to that of the

184 *nucleotide-bound* BtuCD and therefore cannot be used as a template for the modeling of  
185 the *nucleotide-bound* OF form of the *B. cenocepacia* heme importer BhuUV. As an  
186 alternative, we generated a reference homology model (REF1) by using the apo  
187 HmuUV structure as template and replaced the unstable regions in MODEL1 with the  
188 corresponding ones of the REF1 structure to make a chimera. Although the helical  
189 regions in the new model (MODEL2) turned out to be stable, some other parts were still  
190 unstable: the periplasmic gate again spontaneously closed and there was disruption of  
191 the dimer interface (data not shown). We speculated that the structural instability may  
192 have arisen from the low sequence identity of TM6 connected to the CHs (Figure S1)  
193 enlarging the dimer interface by way of the structural coupling. Then, we built the next  
194 model (MODEL3), which involved replacing TM6 in MODEL2 with that in the REF1  
195 structure. Although MODEL3 was stable during the first ~600 ns of the MD simulation,  
196 the periplasmic gate gradually closed after this and eventually closed almost completely  
197 (Figure S3a). We also observed fraying in the helical region at Ala51 to Ala70 in one of  
198 the BhuU monomers (Figure S3b). The gradual closure of the periplasmic gate involved  
199 TM5a of one monomer leaning towards the other (Figure S3a). Then, the final model,  
200 MODEL4, was generated by replacing the fraying region and the leaning helix of  
201 MODEL3 with the corresponding parts of the opposing monomer. This model turned  
202 out to be stable during 1.5  $\mu$ s MD simulation (MD-2ATP-OF) and, importantly, the  
203 periplasmic gate stayed open (Figure S4a and S4b).  $C_{\alpha}$  root mean squared deviation  
204 (RMSD) between the template (PDB 4R9U) and the average structure of the predicted  
205 OF form calculated from the last 500-ns part of the MD trajectory was 2.2 Å (Figure

206 S4c). More details of the modeling are found in SI.

207

208 **Modeling of the Occ intermediate.** Targeted MD (tMD) simulation<sup>38</sup> starting from  
209 the equilibrated ATP-bound IF structure was employed to model an Occ conformation  
210 of BhuUV-T with bound nucleotides. tMD has been widely used to elucidate the  
211 conformational transition pathways of proteins including a type II ABC transporter.<sup>40</sup> In  
212 tMD, a biasing force is applied to pull the protein towards a predefined target structure.  
213 The application of the external force enables one to induce conformational changes in  
214 proteins very efficiently. A caveat is that this method is known to be subject to  
215 “large-scales-first” bias and the pathway may deviate from the actual physical one.<sup>41,42</sup>  
216 We thus disregarded the pathway itself and checked only for stability in the final model.  
217 Note that if one chooses the entire MODEL4 OF structure as a target of tMD, the  
218 simulation would end up with generating the target structure itself. Alternatively, if one  
219 selects a part of the MODEL4 structure as a target, one would obtain protein with the  
220 selected part having conformation of the MODEL4 and the remaining part left almost  
221 unaffected. In our case, the NBDs and the residues of the cytoplasmic gate of the  
222 equilibrated ATP-bound IF structure were pulled so that the domains and the gate closed  
223 as in the MODEL4 OF structure (see SI for details). We then performed an equilibrium  
224 MD simulation without the bias potential on the protein atoms to check the structural  
225 stability of the predicted Occ form. However, this first model was unstable: there was  
226 immediate opening of the cytoplasmic gate and widening of the distances between  
227 coupling helices in a short MD simulation (data not shown). Then, a second model was

228 generated by also pulling TM6 and 7 of both monomers towards the target (MODEL4).  
229 An equilibrium MD simulation (1.5  $\mu$ s) confirmed the structural stability of the  
230 predicted Occ form (MD-2ATP-Occ, Figure S5a).  $C_{\alpha}$ -RMSD between the averaged  
231 structure along the last 500-ns part of the MD trajectory of the Occ form and the  
232 BtuCD-F Occ crystallographic one was 2.5 Å (Figure S5b).

233

234 **MD Simulation details.** All MD simulations were performed with the development  
235 version of GENESIS.<sup>43,44</sup> The force field parameter set for water molecules was  
236 TIP3P,<sup>45,46</sup> and those for protein and lipids were CHARMM36.<sup>47,48</sup> We used revised  
237 parameters for ATP<sup>49</sup> and magnesium ions.<sup>50</sup> The protein was embedded in a  
238 1-palmitoyl-2-oleoyl-sn-glycero-3-phosphoethanolamine (POPE) bilayer. Typical  
239 simulation system size was  $134 \times 134 \times 197 \text{ \AA}^3$  (~360,000 atoms) for the BhuUV-T  
240 system and  $134 \times 134 \times 154 \text{ \AA}^3$  (~280,000 atoms) for the BhuUV system. The equation  
241 of motion was integrated with the velocity Verlet algorithm with a time step of 2.5 fs.  
242 Bonds including a hydrogen atom were constrained by the SHAKE/RATTLE<sup>51</sup>  
243 (non-water molecules) and the SETTLE<sup>52</sup> (water molecules) algorithms. Temperature  
244 and pressure were regulated by the stochastic velocity rescaling thermostat<sup>53</sup> and the  
245 barostat,<sup>54</sup> respectively. The thermostat and the semi-isotropically coupled barostat were  
246 applied every 10 steps. Long range electrostatic interactions were calculated with the  
247 particle mesh Ewald method<sup>55</sup> and updated every 2 steps. Short range Lennard-Jones  
248 interactions were cutoff at 12 Å with a force switching function beginning at 10 Å.<sup>56</sup>  
249 Details are described in SI. MD trajectories related with the manuscript are available at

250 this link <https://osf.io/hfb2c/>.

251

252

## Results

253

254

### 255 **Characteristics of the Predicted Occ and OF Structures.**

256 Crystal structures of heme importer BhuUV and vitamin B<sub>12</sub> transporter BtuCD have

257 identified two gates for heme transport, i.e., the cytoplasmic gate and the periplasmic

258 gate. The cytoplasmic gate, especially the so-called cytoplasmic gate II, is formed by

259 Asn108 and Leu110 (numbering of BhuUV) of opposing monomers which are well

260 conserved among type II ABC transporters (Figure 3a).<sup>37</sup> The periplasmic gate of

261 BhuUV(-T) is formed by Asp200 and Arg204 of opposite subunits which are conserved

262 among heme importers (Figure 4, left).<sup>35</sup> In the IF state of the BhuUV-T crystal

263 structures, the cytoplasmic gate II is widely opened, while the periplasmic gate is closed

264 through a salt bridge between Asp200 and Arg204 (Figure 3a and Figure 4, left).<sup>35</sup>

265 Eventually, the PBP BhuT stably associates to the periplasmic surface of TMD of

266 BhuUV through the electrostatic interaction of Glu94 or Glu231 (BhuT) and Arg84

267 (BhuU) (Figure S6).<sup>35</sup> In the MD simulations of the IF and Occ states, however, those

268 salt-bridges were disrupted, and instead salt-bridge pairs between Glu94 or Glu231 and

269 Arg81 (Bhu) were formed (Figure S5c and S6).

270 In our predicted Occ structures of BhuUV-T, both gates are closed and BhuT still

271 binds to TMD (Figure 3b and 4, middle). In addition, the central cavity, although large

272 enough to accommodate the substrate heme, is filled with water molecules (Figure S7a).

273 The predicted Occ structural characteristics fit well with the crystal structure of the Occ

274 state of the BtuCD-F complex with bound ATP analogs (PDB 4FI3), in which a large

275 central cavity for substrate is also observed (Figure S7b).<sup>37</sup> On the other hand, in the  
276 predicted OF structure of BhuUV, the periplasmic gate is opened, while the  
277 cytoplasmic gate II is closed (Figure 3c and 4, right). Details of the conformational  
278 change from IF to the unique Occ conformation found in our simulation are described in  
279 the following section.

280 Differences between the predicted OF and Occ forms of BhuUV(-T) and the  
281 crystal structures of BtuCD (PDB 4R9U)<sup>36</sup> and BtuCD-F (PDB 4FI3)<sup>37</sup> are best  
282 characterized by the distance between the coupling helices (CHs). The distance in both  
283 predicted structures is shorter ( $\sim 2\text{--}4$  Å) than that in the corresponding crystal structures  
284 (Figure 5). A shorter distance causes a greater tilt of TM6 and 7 of opposing monomers  
285 (Figure S8), and the strong tilt of the TM helices, especially in the OF form, stabilizes  
286 an open periplasmic gate. However, in the MD simulation of the ATP-bound OF BtuCD  
287 with the engineered disulfide bond (BtuCD-2ATP-OF) there is spontaneous closure of  
288 the periplasmic gate within a short period (Figure S9). Spontaneous closure was often  
289 observed in the simulation of the apo OF BtuCD (PDB 1L7V) whose periplasmic gate  
290 is structurally similar to that of the ATP-bound form (PDB 4R9U).<sup>20,57,58</sup> In contrast, the  
291 simulation of the predicted OF form of BhuUV finds a state in which the periplasmic  
292 gate is stably opened due to a greater tilt of the TM helices in the membrane  
293 environment (Figure S4b). Therefore, the modeled structures of BhuUV-T are likely  
294 more relevant to physiological conditions, while the BtuCD(-F) crystal structures seem  
295 trapped in slightly unnatural states possibly due to the introduction of the artificial  
296 disulfide bond and the mutations. Indeed, the mutated BtuCD proteins did not exhibit

297 ATP hydrolysis activity.<sup>37</sup>

298

299 **NBD Dimerization Induces Closure of Cytoplasmic Gate and Opening of**  
300 **Periplasmic gate.**

301 The opened cytoplasmic gate II in the IF structure is due directly to separation of the  
302 extended stretch (exTM3) of opposing monomers (Figure 3a). In the initial step from  
303 the IF state to the Occ state, the binding of ATP promotes dimerization of the NBDs  
304 (Figure 3a, ①), and eventually forces the coupling helices (CHs) and the TM6/7  
305 bundles to lean towards the central cavity (Figure 3a, ②). These conformational  
306 changes pushes TM2, and forces its C-terminal part to tilt towards the central cavity,  
307 eventually closing the cytoplasmic gate II bordered by the exTM3s (Figure 3b). Tight  
308 closure of the gate was maintained throughout the MD simulations of the Occ state  
309 (Figure S5d) and of the OF state (Figure S4d).

310 The disposition of the periplasmic gate of BhuUV(-T) in the IF crystal structure  
311 persists in the predicted Occ state despite large conformational changes in the NBDs  
312 and several TM helices (Figure 4, middle, and Figure S5e). On the other hand, in the OF  
313 state, the periplasmic gate is opened due to the tilt of TM5 and 5a together with other  
314 helices (Figure 4, right, and Figure S4b). The large tilt of the helices on the periplasmic  
315 side of the TMD is coupled to the dissociation of BhuT from TMD BhuU, as discussed  
316 later. Gate opening and closing is highly correlated with dimerization of the NBD. We  
317 measured the distance between two CHs from each NBD monomer for the IF, Occ and  
318 OF structures. As shown in Figure 5, the average distance is 37.1, 30.0 and 26.4 Å, in



319 the MD simulation of the IF, Occ and OF states, respectively. The dimerized forms of  
320 Occ and OF states are somewhat different. The inter-NBD distance of the Occ form  
321 gradually increases and deviated from that of the OF form (Figure S10). We defined the  
322 NBD structure of Occ and OF as “partial” and “full” dimerization forms, respectively.

323

### 324 **Stoichiometry of ATP in the IF-to-OF transition of BhuUV-T.**

325 The role of bound ATP in closing the cytoplasmic gate II was examined in a series of  
326 MD simulations. In the predicted Occ and OF forms of BhuUV(-T), two ATPs are  
327 tightly bound to the active sites and contribute to the tight closure of cytoplasmic gate II  
328 (Figure 3). This is similar to what is observed in the corresponding crystal structures of  
329 BtuCD(-F).<sup>36,37</sup> Consistently, when we added two ATPs to the NBDs of the apo IF  
330 BhuUV-T complex, the CHs, which directly contact the NBDs, tended move closer  
331 (Figure 6a). The importance of ATPs is further highlighted by the following  
332 observation: when we removed two ATPs from the predicted Occ state, there was  
333 spontaneous widening of the CH distance (Figure 6a). Importantly, the narrowing and  
334 widening of the CH distance clearly correlates with the tendency to formation and  
335 destabilization of the cytoplasmic gate II, respectively (Figure 6b), demonstrating  
336 mechanical coupling between the NBD and the TMD. Destabilization of the dimer  
337 interface upon removal of ATPs is also seen in the BtuCD-F system.<sup>59</sup>

338 Is *one* ATP enough to stably close cytoplasmic gate II? To answer this, we  
339 removed one ATP from an arbitrarily chosen active site of the predicted Occ form.  
340 Although the result was not so as clear as in the simulations above, the distance between

341 the CHs consistently widened (Figure 6a). The widening transiently opens the  
342 cytoplasmic gate (Figure 6b). These results suggest that one ATP may be insufficient to  
343 stably close the cytoplasmic gate, and a longer simulation may clarify this.

344

#### 345 **Dissociation of the PBP from TMD Facilitates NBD Dimerization.**

346 In the MD simulation of the predicted Occ form with bound ATP, BhuT was stably  
347 bound to the TMDs, as shown by the distance between conserved<sup>35</sup> salt-bridge pairs  
348 between the TMDs and BhuT (Figure S5c). The observation seems inconsistent with  
349 our previous pull-down assays performed on BhuUV-T, which show that the binding of  
350 ATP, not its hydrolysis, induces dissociation of BhuT.<sup>35</sup> Therefore, the Occ form appears  
351 to be in a BhuT-dissociation dwell state with a longer dwelling time than the simulation  
352 time scale (1.5  $\mu$ s).

353 A comparison between Occ and OF structures showed that the CHs and the helix  
354 bundles (TM6/7) in the OF form lean further than those in the Occ form, resulting in the  
355 opening the periplasmic gate (Figure 4 and 5). However, these structural changes could  
356 not be allowed in the BhuUV-T Occ form, probably due to the capping by the bound  
357 BhuT. Therefore, it was indicated that the dissociation of BhuT (PBP) from TMD of  
358 BhuUV and the structural change on the periplasmic side are coupled with each other,  
359 which is followed by “full” dimerization of the NBDs (Figure 2c). In other words, PBP  
360 (BhuT) dissociation facilitates NBD (BhuV) dimerization.

361

#### 362 **Orientation of the Catalytic Serine Residues.**

363 During MD simulation of the Occ state, we witnessed orientational changes of the  
364 catalytically important serine residues (Ser147)<sup>60</sup> in the LSGG[Q/E] motifs in the NBDs  
365 (Figure 7a, upper panel). Namely, the side chain of Ser147 in either monomer  
366 occasionally flipped between the  $\gamma$ -phosphate of ATP and the glutamate residue of the  
367 LSGG[Q/E] motif (Figures 7a, 7c and S11a). The change in orientation from the  
368 potentially catalytic to the non-catalytic forms clearly correlates with a subtle increase  
369 in the distance between the P-loop and the LSGG[Q/E] motif (Figure 7a) which  
370 sandwich ATP (Figure 7c), due to the “partial” dimerization.

371 As shown in Figure 7a, an interesting finding in the Occ state is that the side chain  
372 swiveling occurred more frequently in one of the nucleotide-binding sites than the other.  
373 Here, we designate the former as NBS1 and the latter as NBS2, respectively. The  
374 difference in side-chain mobility of Ser147 originates from the asymmetrical  
375 dimerization in the Occ state. The distance between the P-loop and the LSGG[Q/E]  
376 motif in NBS1 is larger than that in NBS2, resulting in more frequent dissociation of the  
377 side chain of the serine residue (Figure 7a, lower panel).

378 In contrast, in the OF state, Ser147 of both monomers is always perfectly oriented  
379 toward the  $\gamma$ -phosphate of ATP (Figure 7b, upper panel) presumably due to the stable  
380 “full” dimerization of the NBDs (Figure 7b, lower panel and Figure S10). The “full”  
381 dimerization (Figure S10) realizes shorter distances and holds the serine residues in a  
382 catalytic orientation (Figure 7b). Ser147 appears key in modulating the catalytic power  
383 of the protein in the functional cycle, as discussed below.

384

385

## Discussion and Conclusions

386

387

388 In this study, we predicted two unknown conformations of a type II heme ABC importer  
389 BhuUV-T in order to elucidate the mechanism by which the futile usage of ATP in the  
390 Occ state can be avoided. The results lead us to propose a chemo-mechanical coupling  
391 mechanism where the Ser residues (Ser147) of the ABC signature LSGG[Q/E] motifs  
392 play a fundamental role in modulating catalytic activity of the transporter (Figure 8). In  
393 this mechanism, the progress of conformational changes of the protein determines  
394 ATPase activity, in the following manner:

395 1. In the IF state, the protein is in an ATP-binding dwell and the catalytic sites are  
396 “empty” (without bound ATP), as represented by the crystal structure (PDB 5B58).

397 2. The binding of ATP to NBD (BhuV) of the IF form triggers a conformational change  
398 to the Occ form. The Occ form is apparently in a BhuT-dissociation dwell, because the  
399 bound BhuT hinders further tilting of TM helices and narrowing of the inter-CHs space.  
400 The structural constraint holds the NBDs somewhat apart due to structural coupling  
401 between the NBDs and the CHs, stabilizing “partial” dimerization. As a result, the  
402 catalytic sites are in a “loose” state, in which the Ser residues (Ser147) of LSGG[Q/E]  
403 motifs frequently flip away from the  $\gamma$ -phosphate of ATP, and thereby catalytic activity  
404 is partially lost. The hydrolysis reaction is decelerated.

405 3. In going from the Occ to OF states, dimerization of the NBDs gradually proceeds,  
406 and with the dissociation of BhuT full tilting of the TM helices and complete  
407 dimerization of the NBDs are achieved. These conformational changes gradually

408 constraint the side chains of the two Ser147s so that their orientations become  
409 increasingly catalytic and full competency and maximal ATPase activity are realized  
410 upon final dimer engagement of the NBDs. These catalytic sites are now in a “tight”  
411 state (Figure 8).

412 Oldham and Chen<sup>61</sup> have recently pointed out the role of the serine residues in  
413 coupling conformational change of a type I maltose ABC transporter to its catalytic  
414 activity, and that its role resembles that of the “arginine finger” of the biomolecular  
415 motor F<sub>1</sub>-ATPase, which controls the catalytic activity of the protein.<sup>62</sup> However, to our  
416 knowledge, the mechanism, by which the wasteful hydrolysis of ATP in the Occ state is  
417 avoided, has not yet been addressed for any ABC transporters. Here, by combined use  
418 of structural modeling and MD simulation, the mechanism of chemo-mechanical  
419 coupling in the type II ABC transporter can be explained in atomistic detail.

420 With respect to the mechanism of the heme transport by BhuUV-T, our  
421 mechanism proposed for BhuUV-T is apparently similar to that for the molybdate  
422 importer MolBC, but somewhat different from those for BtuCD-F and HmuUV.<sup>11,37,63–66</sup>  
423 For example, the closure of the cytoplasmic gate II in the proposed IF-to-OF transition  
424 pathway of BhuUV-T is consistent with an electron paramagnetic resonance (EPR)  
425 spectroscopy study on MolBC.<sup>63</sup> Moreover, key features in the crystal structure of  
426 MolBC are consistent with those of BhuUV. Both structures have been determined in  
427 the IF form without bound ATP.<sup>35,64</sup> On the other hand, the existing crystal structures of  
428 BtuCD and HmuUV without bound ATP were solved in the OF form with a closed  
429 cytoplasmic gate I, which is bordered by the N-terminal part of TM5 of opposing

430 monomers (Table S1).

431       The transport cycle of a vitamin B<sub>12</sub> transporter BtuCD-F of type II ABC importer  
432 family involves a different state that is not considered in this study.<sup>11,37</sup> Namely, the  
433 ATP-binding dwell of BtuCD-F is an asymmetric apo Occ state (PDB 2QI9),<sup>65</sup> unlike to  
434 BhuUV-T and MolBC (Figure S12a). Notably, the cytoplasmic side of the asymmetric  
435 apo Occ crystal structure is closed differently from BhuUV-T and MolBC. The gate of  
436 BtuCD-F in the apo Occ state is at cytoplasmic gate I. Furthermore, the transport cycle  
437 of BtuCD-F does not involve a state like the PBP-dissociation dwell (Figure S12b,  
438 middle), even though a crystal structure that could represent the state has been found for  
439 BtuCD-F (PDB 4FI3, Figure S12a). Alternatively, this latter BtuCD-F structure has  
440 been considered to be a vitamin B<sub>12</sub>-loaded Occ state despite the absence of bound  
441 substrate in the crystal structure.<sup>11,37</sup> These studies imply some mechanistic divergence  
442 among the type II ABC importer family, a view supported by a recent biochemical study  
443 on HmuUV.<sup>66</sup>

444       It seems that the binding of ATP to the NBDs of the asymmetric Occ form of  
445 BtuCD-F inevitably forces dimerization of the NBDs, resulting in opening of the  
446 cytoplasmic gate I and closure of cytoplasmic gate II, as observed in the crystal  
447 structure (PDB 4FI3). Therefore, the ATP-bound form of the Occ state with the  
448 cytoplasmic gate II closed may appear between the asymmetric occluded and the OF  
449 forms, as proposed in the transport mechanism of BhuUV-T (Figure 8 and S12b).  
450 Concern over a futile hydrolysis reaction in the ATP-bound Occ form can be partially  
451 allayed by our chemo-mechanical coupling mechanism.

452           The dynamic nature of ABC transporters renders experimental elucidation of  
453 chemo-mechanical coupling mechanisms a challenging task. For instance, ATPase  
454 activity of BhuUV-T is measured as the time course of the concentration of released  
455 inorganic phosphate ions upon the addition of ATP.<sup>35</sup> The observed kinetic parameters  
456 represent multiple dynamic processes including the IF-to-OF conformational transition  
457 and the dissociation of BhuT, complicating interpretation. The complexity behind such a  
458 single experimental parameter highlights the usefulness of our coupled computational  
459 structural modeling and MD simulation approach in deciphering chemo-mechanical  
460 coupling, as it allows for direct characterization of motions of a protein and its catalytic  
461 sites along the functional cycle. The prediction from simulation and our proposed  
462 mechanism can now be tested experimentally.

463           In summary, template-based iterative MD simulation and biased MD predict two  
464 structurally unknown conformations of type II heme ABC importer BhuUV-T, and  
465 provide insights into the chemo-mechanical coupling mechanism. Both structures  
466 exhibit high stability in a membrane environment and show how binding of ATP is  
467 coupled to conformational changes of the protein. The dimerization of the NBDs in the  
468 predicted Occ form is incomplete due to structural constraints imposed by bound BhuT.  
469 As a consequence, the side chains of the serine residues of the conserved LSGG[Q/E]  
470 motifs flip between catalytic and non-catalytic orientations, resulting in impaired  
471 catalytic activity. Dissociation of BhuT in the OF form enable tight dimerization of the  
472 NBDs and proper serine orientation, activating full catalytic power of the protein. These  
473 results led us to a definitive answer to the question on the futile usage of ATP in the Occ



474 state. The proposed chemo-mechanical coupling mechanism may provide basis for the  
475 understanding of transport mechanism of many ABC transporters having different  
476 structural folds.

477

## Acknowledgments

478

479 K.T. thanks J. Jung, C. Kobayashi, Y. Matsunaga, and M. Kamiya for sharing their  
480 expertise on running simulations on the K computer. This work was supported by the  
481 RIKEN pioneering project “Dynamic Structural Biology” (to Y.Sugita), MEXT  
482 Grant-in-Aid for Scientific Research on Innovative Areas Grant Number 26119006 (to  
483 Y.Sugita), JP26220807 (to Y.Shiro), JP15H01655, JP17H05896 (to H.Sugimoto), and  
484 RIKEN Special Postdoctoral Researcher Program (to K.T.). This research used  
485 computational resources of the K computer provided by the RIKEN Center for  
486 Computational Science through the HPCI System Research project (to K.T., Project ID:  
487 hp170027, hp180009, to Y.Sugita, ra000009). Molecular figures were prepared with  
488 VMD<sup>67</sup> and PyMOL.<sup>68</sup>

489

## References

490

491

- 492 1. R Watanabe and H Noji, 2013, Chemomechanical coupling mechanism of  
493 F<sub>1</sub>-ATPase: Catalysis and torque generation, *FEBS Lett.*, **587**: 1030–1035.
- 494 2. M Preller and DJ Manstein, 2013, Myosin structure, allostery, and  
495 mechano-chemistry, *Structure*, **21**: 1911–1922.
- 496 3. MP Mueller and RS Goody, 2016, Ras GTPases and myosin: qualitative  
497 conservation and quantitative diversification in signal and energy transduction,  
498 *Biopolymers*, **105**: 422–430.
- 499 4. LH Pearl and C Prodromou, 2006, Structure and mechanism of the Hsp90  
500 molecular chaperone machinery, *Annu. Rev. Biochem.*, **75**: 271–294.
- 501 5. J Abe, TB Hiyama, A Mukaiyama, S Son, T Mori, S Saito, M Osako, J Wolanin, E  
502 Yamashita, T Kondo, and S Akiyama, 2015, Atomic-scale origins of slowness in the  
503 cyanobacterial circadian clock, *Science*, **349**: 312–316.
- 504 6. A Warshel, 1998, Electrostatic origin of the catalytic power of enzymes and the role  
505 of preorganized active sites, *J. Biol. Chem.*, **273**: 27035–27038.
- 506 7. S Koppole, JC Smith, and S Fischer, 2007, The structural coupling between ATPase  
507 activation and recovery stroke in the myosin II motor, *Structure*, **15**: 825–837.
- 508 8. Y Yang, H Yu, and Q Cui, 2008, Extensive conformational transitions are required  
509 to turn on ATP hydrolysis in myosin, *J. Mol. Biol.*, **381**: 1407–1420.
- 510 9. IB Holland and MA Blight, 1999, ABC-ATPases, adaptable energy generators  
511 fueling transmembrane movement of a variety of molecules in organisms from  
512 bacteria to humans, *J. Mol. Biol.*, **293**: 381–399.
- 513 10. J ter Beek, A Guskov, and DJ Slotboom, 2014, Structural diversity of ABC  
514 transporters, *J. Gen. Physiol.*, **143**: 419–435.
- 515 11. KP Locher, 2016, Mechanistic diversity in ATP-binding cassette (ABC) transporters,  
516 *Nat. Struct. Mol. Biol.*, **23**: 487–493.
- 517 12. T-C Hwang, J-T Yeh, J Zhang, Y-C Yu, H-I Yeh, and S Destefano, 2018, Structural  
518 mechanisms of CFTR function and dysfunction, *J. Gen. Physiol.*, **150**: 539–570.
- 519 13. RW Robey, KM Pluchino, MD Hall, AT Fojo, SE Bates and MM Gottesman, 2018,  
520 Revisiting the role of ABC transporters in multidrug-resistance cancer, *Nat. Rev.*  
521 *Cancer*, **18**: 452–464.
- 522 14. JE Walker, M Saraste, MJ Runswick, and NJ Gay, 1982, Distantly related

- 523 sequences in the  $\alpha$ - and  $\beta$ -subunits of ATP synthase, myosin, kinases and other  
524 ATP-requiring enzymes and a common nucleotide binding fold, *EMBO J.*, **1**: 945–  
525 951.
- 526 15. CH Higgins, ID Hiles, GPC Salmond, DR Gill, JA Downie, IJ Evans, IB Holland, L  
527 Gray, SD Buckel, AW Bell, and MA Hermodson, 1986, A family of related  
528 ATP-binding subunits coupled to many distinct biological processes in bacteria,  
529 *Nature*, **323**: 448–450.
- 530 16. PM Jones and AM George, 1999, Subunit interactions in ABC transporters: towards  
531 a functional architecture, *FEMS Microbiol. Lett.*, **179**: 187–202.
- 532 17. PC Smith, N Karpowich, L Millen, JE Moody, J Rosen, PJ Thomas, and JF Hunt,  
533 2002, ATP binding to the motor domain from an ABC transporter drives formation  
534 of a nucleotide sandwich dimer, *Mol. Cell.*, **10**: 139–149.
- 535 18. P Zhang, 2013, Structure and mechanism of energy-coupling factor transporters,  
536 *Trends Microbiol.*, **21**: 652–659.
- 537 19. J-Y Lee and DE Rosenbaum, 2017, Transporters revealed, *Cell*, **168**: 951–953.
- 538 20. J Sonne, C Kandt, GH Peters, FY Hansen, MO Jensen, and DP Tieleman, 2007,  
539 Simulation of the coupling between nucleotide binding and transmembrane  
540 domains in the ATP binding cassette transporter BtuCD, *Biophys. J.*, **92**: 2727–  
541 2734.
- 542 21. PY Pendse, BR Brooks, and JB Klauda, 2010, Probing the periplasmic-open state  
543 of lactose permease in response to sugar binding and proton translocation, *J. Mol.*  
544 *Biol.*, **404**: 506–521.
- 545 22. SA Shaikh and E Tajkhorshid, 2010, Modeling and dynamics of the inward-facing  
546 state of a  $\text{Na}^+/\text{Cl}^-$  dependent neurotransmitter transporter homologue, *PLoS Comput.*  
547 *Biol.*, **6**: e1000905.
- 548 23. M Moradi and E Tajkhorshid, 2013, Mechanistic picture for conformational  
549 transition of a membrane transporter at atomic resolution, *Proc. Natl. Acad. Sci.*  
550 *USA*, **110**: 18916–18921.
- 551 24. J-P Machtens, D Kortzak, C Lansche, A Leinenweber, P Kilian, B Begemann, U  
552 Zachariae, D Ewers, BL de Groot, R Briones, and C Fahlke, 2015, Mechanisms of  
553 anion conduction by coupled glutamate transporters, *Cell*, **160**: 542–553.
- 554 25. M Moradi, G Enkavi and E Tajkhorshid, 2015, Atomic-level characterization of  
555 transport cycle thermodynamics in the glycerol-3-phosphate:phosphate antiporter,

- 556 *Nat. Commun.*, **6**: 8393.
- 557 26. MH Cheng and I Bahar, 2015, Molecular mechanism of dopamine transport by  
558 human dopamine transporter, *Structure*, **23**: 2171–2181.
- 559 27. A Pietropaolo, CL Pierri, F Palmieri, and M Klingenberg, 2016, The switching  
560 mechanism of the mitochondrial ADP/ATP carrier explored by free-energy  
561 landscapes, *Biochim. Biophys. Acta*, **1857**: 772–781.
- 562 28. K Tamura and S Hayashi, 2017, Atomistic modeling of alternating access of a  
563 mitochondrial ADP/ATP membrane transporter with molecular simulations, *PLoS*  
564 *ONE*, **12**: e0181489.
- 565 29. M Ke, Y Yuan, X Jiang, Nieng Yan, and H Gong, 2017, Molecular determinants for  
566 the thermodynamic and functional divergence of uniporter GLUT1 and proton  
567 symporter Xyle, *PLoS Comput. Biol.*, **13**: e1005603.
- 568 30. H Goddeke, MH Timachi, CAJ Hutter, L Galazzo, MA Seeger, M Karttunen, E  
569 Bordignon, and LV Schafer, 2018, Atomistic mechanism of large-scale  
570 conformational transition in a heterodimeric ABC exporter, *J. Am. Chem. Soc.*, **140**:  
571 4543–4551.
- 572 31. A Sali and TL Blundell, 1993, Comparative protein modelling by satisfaction of  
573 spatial restraints, *J. Mol. Biol.*, **234**: 779–815.
- 574 32. MA Marti-Renom, AC Stuart, A Fiser, R Sanchez, F Melo, and A Sali, 2000,  
575 Comparative protein structure modeling of genes and genomes, *Annu. Rev. Biophys.*  
576 *Biomol. Struct.*, **29**: 291–325.
- 577 33. L Domicевичa and PC Biggin, 2015, Homology modelling of human P-glycoprotein,  
578 *Biochem. Soc. Trans.*, **43**: 952–958.
- 579 34. I Callebaut, B Hoffmann, P Lehn, and J-P Mornon, 2017, Molecular modeling and  
580 molecular dynamics of CFTR, *Cell. Mol. Life. Sci.*, **74**: 3–22.
- 581 35. Y Naoe, N Nakamura, A Doi, M Sawabe, H Nakamura, Y Shiro, and H Sugimoto,  
582 2016, Crystal structure of bacterial haem importer complex in the inward-facing  
583 conformation, *Nat. Commun.*, **7**: 13411.
- 584 36. VM Korkhov, SA Mireku, DB Veprintsev, and KP Locher, 2014, Structure of  
585 AMP-PNP-bound BtuCD and mechanism of ATP-powered vitamin B12 transport  
586 by BtuCD-F, *Nat. Struct. Mol. Biol.*, **21**: 1097–1099.
- 587 37. VM Korkhov, SA Mireku, and KP Locher, 2012, Structure of AMP-PNP-bound  
588 vitamin B<sub>12</sub> transporter BtuCD-F, *Nature*, **490**: 367–372.

- 589 38. J Schlitter, M Engels, P Krüger, E Jacoby and A Wollmer, 1993, Targeted molecular  
590 dynamics simulation of conformational change-application to the T  $\leftrightarrow$  R transition  
591 in insulin, *Mol. Simul.*, **10**: 291–308.
- 592 39. J-S Woo, A Zeltina, BA Goetz and KP Locher, 2012, X-ray structure of the *Yersinia*  
593 *pestis* heme transporter HmuUV, *Nat. Struct. Mol. Biol.*, **19**: 1310–1315.
- 594 40. J Weng, K Fan, and W Wang, 2012, The conformational transition pathways of  
595 ATP-binding cassette transporter BtuCD revealed by targeted molecular dynamics  
596 simulation, *PLoS ONE*, **7**: e30465.
- 597 41. V Ovchinnikov and M Karplus, 2012, Analysis and elimination of a bias in targeted  
598 molecular dynamics simulations of conformational transitions: application to  
599 calmodulin, *J. Phys. Chem. B*, **116**: 8584–8603.
- 600 42. K Tamura and S Hayashi, 2015, Linear response path following: a molecular  
601 dynamics method to simulate global conformational changes of protein upon ligand  
602 binding, *J. Chem. Theory Comput.*, **11**: 2900–2917.
- 603 43. J Jung, T Mori, C Kobayashi, Y Matsunaga, T Yoda, M Feig, and Y Sugita, 2015,  
604 GENESIS: A hybrid-parallel and multi-scale molecular dynamics simulator with  
605 enhanced sampling algorithms for biomolecular and cellular simulations, *WIREs*  
606 *Comput. Mol. Sci.*, **5**: 310–323.
- 607 44. C Kobayashi, J Jung, Y Matsunaga, T Mori, T Ando, K Tamura, M Kamiya, and Y  
608 Sugita, 2017, GENESIS 1.1: A hybrid-parallel molecular dynamics simulator with  
609 enhanced sampling algorithms on multiple computational platforms, *J. Comput.*  
610 *Chem.*, **38**: 2193–2206.
- 611 45. AD MacKerell, D Bashford, M Bellott, RL Dunbrack, JD Evanseck, MJ Field, et al.,  
612 1998, All-atom empirical potential for molecular modeling and dynamics studies of  
613 proteins, *J. Phys. Chem. B*, **102**: 3586–3616.
- 614 46. WL Jorgensen, J Chandrasekhar, JD Madura, RW Impey, and ML Klein, 1983,  
615 Comparison of simple potential functions for simulating liquid water, *J. Chem.*  
616 *Phys.*, **79**: 926–935.
- 617 47. RB Best, X Zhu, J Shim, PEM Lopes, J Mittal, M Feig, and AD Mackerell, Jr.,  
618 2012, Optimization of the additive CHARMM all-atom protein force field targeting  
619 improved sampling of the backbone  $\phi$ ,  $\psi$  and side-chain  $\chi_1$  and  $\chi_2$  dihedral angles, *J.*  
620 *Chem. Theory Comput.*, **8**: 3257–3273.
- 621 48. JB Klauda, RM Venable, JA Freites, JW O'Connor, DJ Tobias, C

- 622 Mondragon-Ramirez, et al., 2010, Update of the CHARMM all-atom additive force  
623 field for lipids: Validation on six lipid types, *J. Phys. Chem. B*, **114**: 7830–7843.
- 624 49. Y Komuro, S Re, C Kobayashi, E Muneyuki, and Y Sugita, 2014, CHARMM  
625 force-fields with modified polyphosphate parameters allow stable simulation of the  
626 ATP-bound structure of Ca<sup>2+</sup>-ATPase, *J. Chem. Theory Comput.*, **10**: 4133–4142.
- 627 50. O Allner, L Nilsson, and A Villa, 2012, Magnesium ion-water coordination and  
628 exchange in biomolecular simulations, *J. Chem. Theory Comput.*, **8**: 1493–1502.
- 629 51. HC Andersen, 1983, RATTLE: A “velocity” version of the SHAKE algorithm for  
630 molecular dynamics calculations, *J. Comput. Phys.*, **52**: 24–34.
- 631 52. S Miyamoto and PA Kollman, 1992, SETTLE: An analytical version of the SHAKE  
632 and RATTLE algorithm for rigid water models, *J. Comput. Chem.*, **13**: 952–962.
- 633 53. G Bussi, D Donadio, and M Parrinello, 2007, Canonical sampling through velocity  
634 rescaling, *J. Chem. Phys.*, **126**: 014101.
- 635 54. G Bussi, T Zykova-Timan, and M Parrinello, 2009, Isothermal-isobaric molecular  
636 dynamics using stochastic velocity rescaling, *J. Chem. Phys.*, **130**: 074101.
- 637 55. T Darden, D York, L Pedersen, 1993, Particle mesh Ewald: An N•log(N) method  
638 for Ewald sums in large systems, *J. Chem. Phys.*, **98**: 10089–10092.
- 639 56. PJ Steinbach and BR Brooks, 1994, New Spherical-cutoff methods for long-range  
640 forces in macromolecular simulation, *J. Comput. Chem.*, **15**: 667–683.
- 641 57. EO Oloo and DP Tieleman, 2004, Conformational transitions induced by the  
642 binding of MgATP of the vitamin B<sub>12</sub> ATP-binding cassette (ABC) transporter  
643 BtuCD, *J. Biol. Chem.*, **279**: 45013–45019.
- 644 58. C Kandt and DP Tieleman, 2010, Holo-BtuF stabilizes the open conformation of  
645 the vitamin B<sub>12</sub> ABC transporter BtuCD, *Proteins*, **78**: 738–753.
- 646 59. C Pan, J Weng, and W Wang, 2016, Conformational dynamics and protein–  
647 substrate interaction of ABC transporter BtuCD at the occluded state revealed by  
648 molecular dynamics simulations, *Biochemistry*, **55**: 6897–6907.
- 649 60. G Tomblin, L Bartholomew, K Gimi, GA Tyndall, and AE Senior, 2004, Synergy  
650 between conserved ABC signature Ser residues in P-glycoprotein catalysis. *J. Biol.*  
651 *Chem.*, **279**: 5363–5373.
- 652 61. ML Oldham and J Chen, 2011, Crystal structure of the maltose transporter in the  
653 pretranslocation intermediate state, *Science*, **332**: 1202–1205.
- 654 62. A Yukawa, R Iino, R Watanabe, S Hayashi, and H Noji, 2015, Key chemical factors

- 655 of arginine finger catalysis of F1-ATPase clarified by an unnatural amino acid  
656 mutation, *Biochemistry*, **54**: 472–480.
- 657 63. AJ Rice, FJD Alvarez, KM Schultz, CS Klug, AL Davidson, and HW Pinkett, 2013,  
658 EPR Spectroscopy of MolB<sub>2</sub>C<sub>2</sub>-A reveals mechanism of transport for a bacterial  
659 type II molybdate importer, *J. Biol. Chem.*, **288**: 21228–21235.
- 660 64. HW Pinkett, AT Lee, P Lum, KP Locher, and DC Rees, 2007, An inward-facing  
661 conformation of a putative metal-chelate-type ABC transporter, *Science*, **315**: 373–  
662 377.
- 663 65. RN Hvorup, BA Goetz, M Niederer, K Hollenstein, E Perozo, and KP Locher, 2007,  
664 Asymmetry in the structure of the ABC transporter-binding protein complex  
665 BtuCD-BtuF, *Science*, **317**: 1387–1390.
- 666 66. H Qasem-Abdullah, M Perach, N Livnat-Levanon, and O Lewinson, 2017, ATP  
667 binding and hydrolysis disrupt the high-affinity interaction between the heme ABC  
668 transporter HmuUV and its cognate substrate-binding protein, *J. Biol. Chem.*, **292**:  
669 14617–14624.
- 670 67. W Humphrey, A Dalke, and K Schulten, 1996, VMD: visual molecular dynamics, *J.*  
671 *Mol. Graphics.*, **14**: 33–38.
- 672 68. The PyMOL Molecular Graphics System, Version 1.7 Schrödinger, LLC.  
673



674

## Figures

675

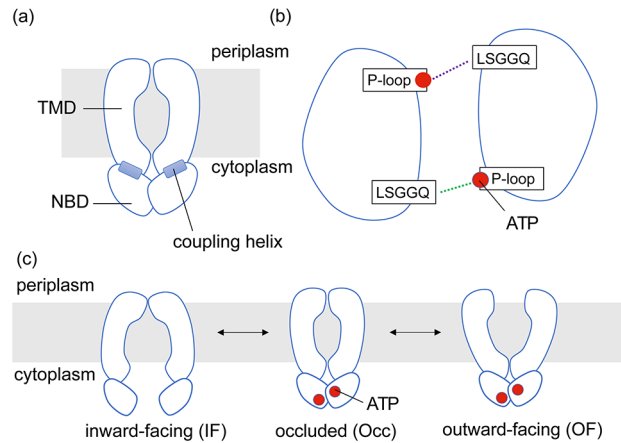

676

677

678 **Figure 1. Architecture and alternating access mechanism of ABC**  
679 **transporter.** (a) A shared architecture of ABC transporter. Transmembrane domains  
680 (TMDs) are embedded in the biological membrane, whereas nucleotide-binding  
681 domains (NBDs) are exposed to the cytoplasm. They are physically connected by the  
682 coupling helices. (b) Dimerization interface of NBDs as seen from the periplasmic side.  
683 They dimerize upon binding of ATP to the P-loop in a head-to-tail fashion, where the  
684 P-loop of one monomer binds to the LSGG[E/Q] motif of the opposing monomer. (c)  
685 An alternating access mechanism of ABC transporter. The conformational transition  
686 from the inward-facing (IF) to the outward-facing (OF) form involves the binding of  
687 ATP to the NBDs and the formation of the occluded (Occ) state.

688

689

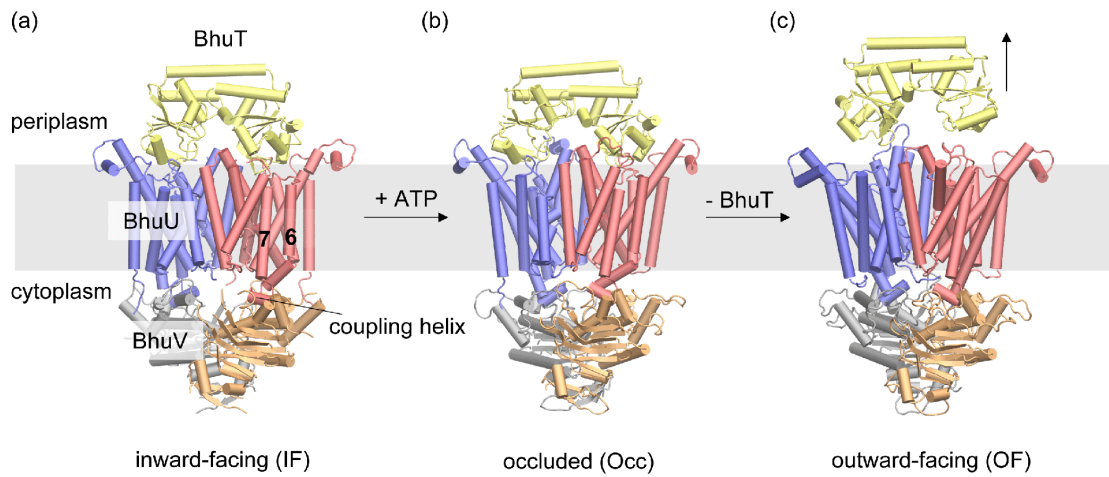

690

691

692 **Figure 2. Structures of heme importer BhuUV-T.** (a) Crystal structure of  
693 BhuUV-T complex (PDB 5B58) in the inward-facing conformation. Transmembrane  
694 domains (TMDs, dimer of BhuU) are shown in blue or red. Nucleotide-binding domains  
695 (NBDs, dimer of BhuV) are shown in gray or orange. Periplasmic binding domain (PBP,  
696 BhuT) is shown in yellow. (b,c) Alternate conformations of BhuUV-T predicted in this  
697 study. (b) The occluded and (c) the outward-facing conformations.

698

699

700

701

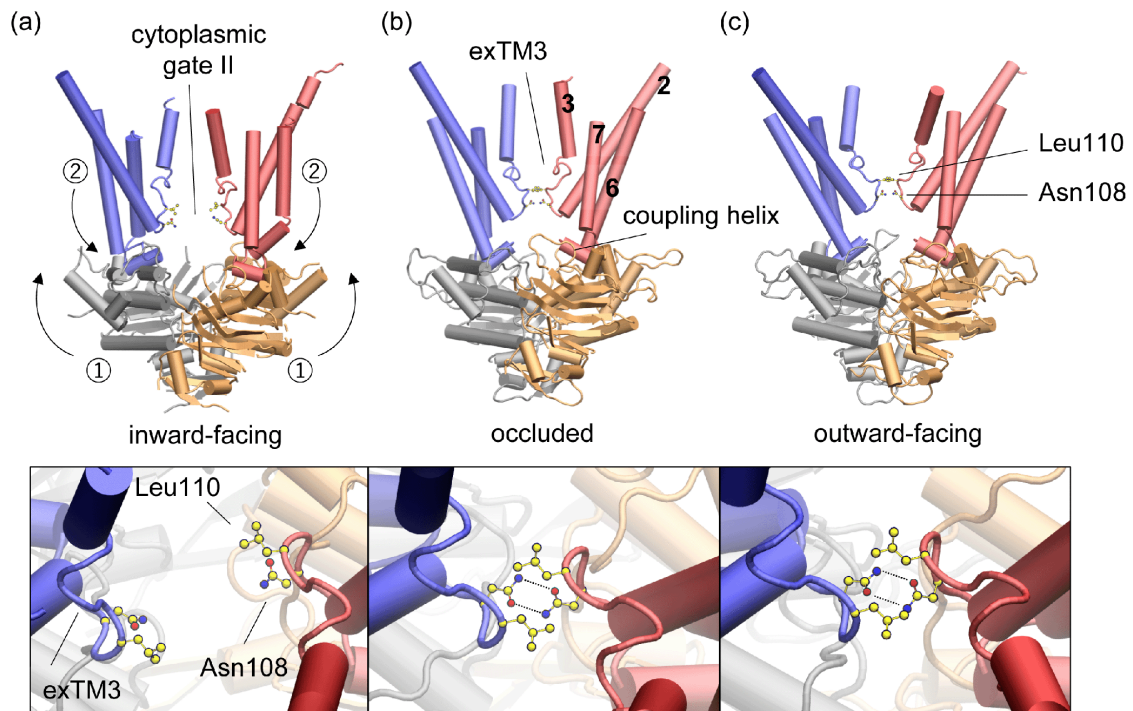

702

703

704

**Figure 3. Closure of the cytoplasmic gate II coupled to NBD dimerization.**

705 The cytoplasmic gate is open in the inward-facing (IF) conformation (a), while it is

706 closed in the occluded (Occ) (b) and the outward-facing (OF) (c) conformations. The

707 upper panels show the transporter from the membrane space and the lower ones from

708 the periplasmic space. Only TM2–3 and 6–7 are shown for the TMDs. Carbon, nitrogen,

709 and oxygen atoms are in yellow, blue, and red, respectively.

710

711

712

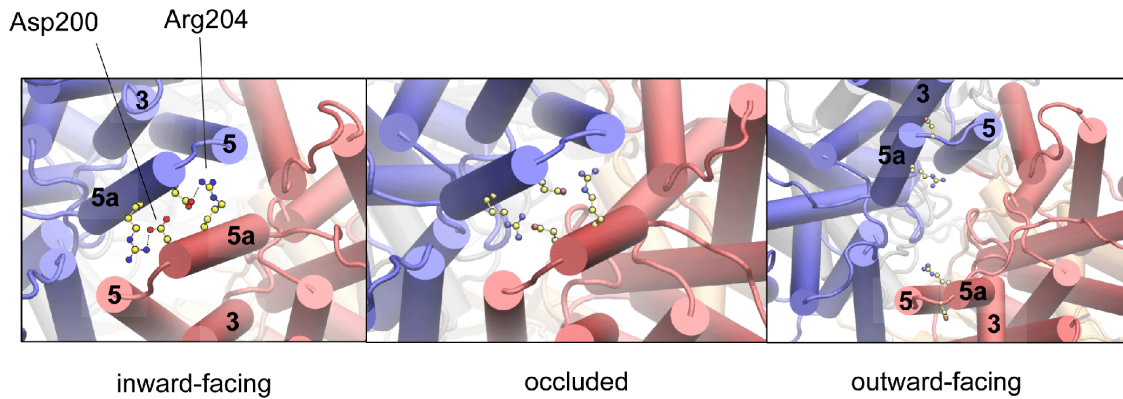

713

714

715 **Figure 4. Opening of the periplasmic gate upon the binding of ATP.** The  
716 panels show the transporter from the periplasm space. In the inward-facing (IF) state  
717 (left, PDB 5B58), the periplasmic gate is sealed by TM5 and 5a of opposing monomers.  
718 The inter-domain salt bridges between Asp200 and Arg204 stabilize the dimer interface.  
719 The situation is not changed in the predicted occluded (Occ) state (middle), while in the  
720 predicted outward-facing (OF) state (right), the gate is wide open due to the large tilt of  
721 the TM helices.

722

723

724

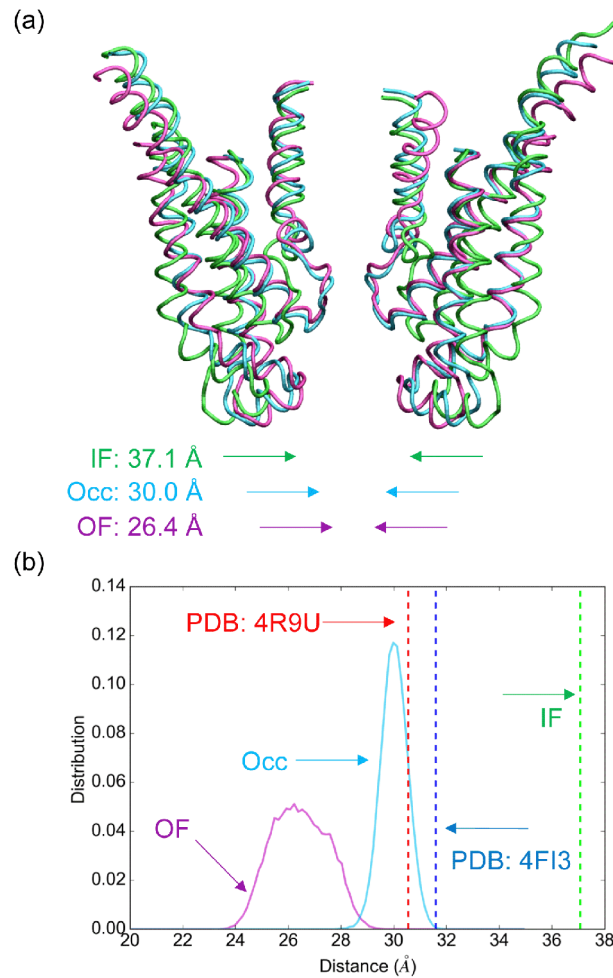

725

726

727 **Figure 5. Comparison of the distance between the coupling helices of type**

728 **II ABC importers in different conformational states.** (a) The predicted OF

729 (magenta) and Occ (sky blue) average structures along the last 500-ns equilibrium MD

730 simulation are superimposed on the IF crystal structure (green). Only TM2–3 and

731 TM6–7 of the TMDs are shown. Distance between the coupling helices (CHs) for each

732 structure is denoted at the bottom. (b) Distribution of distance between the CHs in the

733 last 500-ns equilibrium MD simulation for each conformation.

734

735

736

737

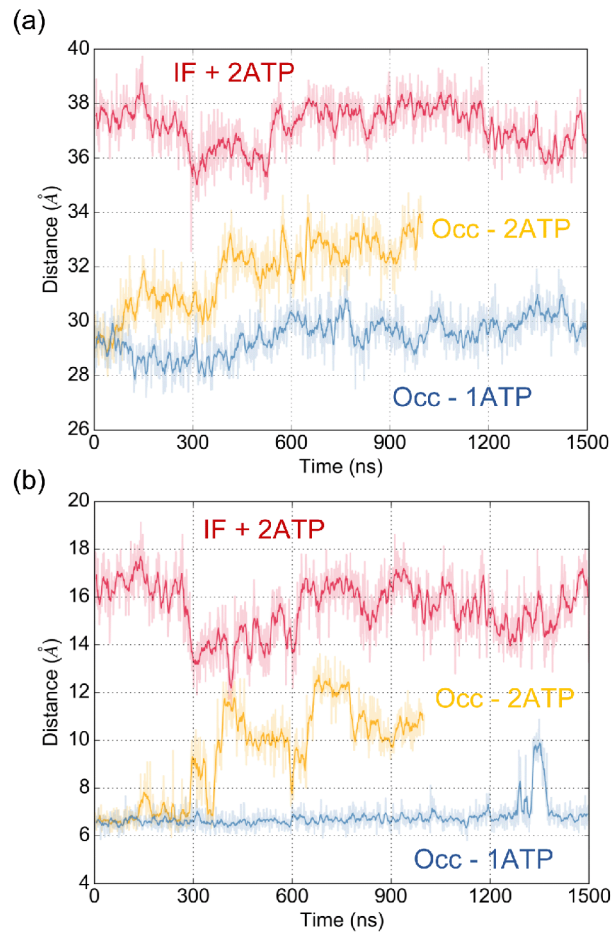

738

739 **Figure 6. Structural changes in the equilibrium MD simulations.** (a,b)

740 Temporal changes of distance between (a) the coupling helices and (b) Leu110 of

741 opposing monomers during the MD-IF-2ATP (IF + 2ATP), MD-apo-Occ (Occ – 2ATP),

742 and MD-Occ-1ATP (Occ – 1 ATP) trajectories.

743

744





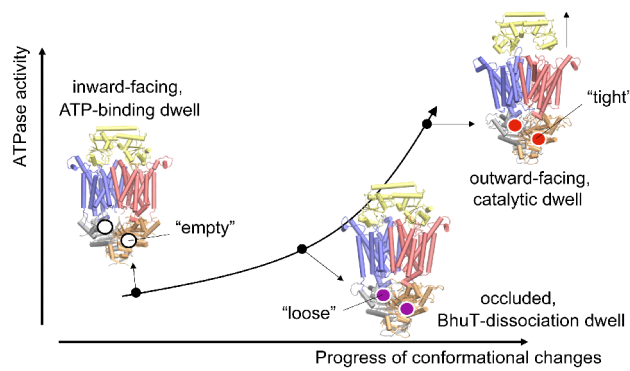

757

758

759 **Figure 8. Proposed chemo-mechanical coupling model.** The horizontal axis  
760 describes progress of conformational changes (e.g. distance between coupling helices),  
761 whereas the vertical axis indicates the ATPase activity of the protein. In this model, the  
762 progress of conformational changes is coupled to the ATPase activity of the protein (the  
763 curved arrow) so that as the conformation transition proceeds from the inward-facing  
764 (IF) state to the outward-facing (OF) one, the ATPase activity gradually increases.

765

766

767
